# Supplementary material for: Failure to Detect Mutations in U2AF1 due to Changes in the GRCh38 Reference Sequence
Source: PubMed Central journal article supplement (PMC8950341; doi:10.1016/j.jmoldx.2021.10.013), 2022-03

**A**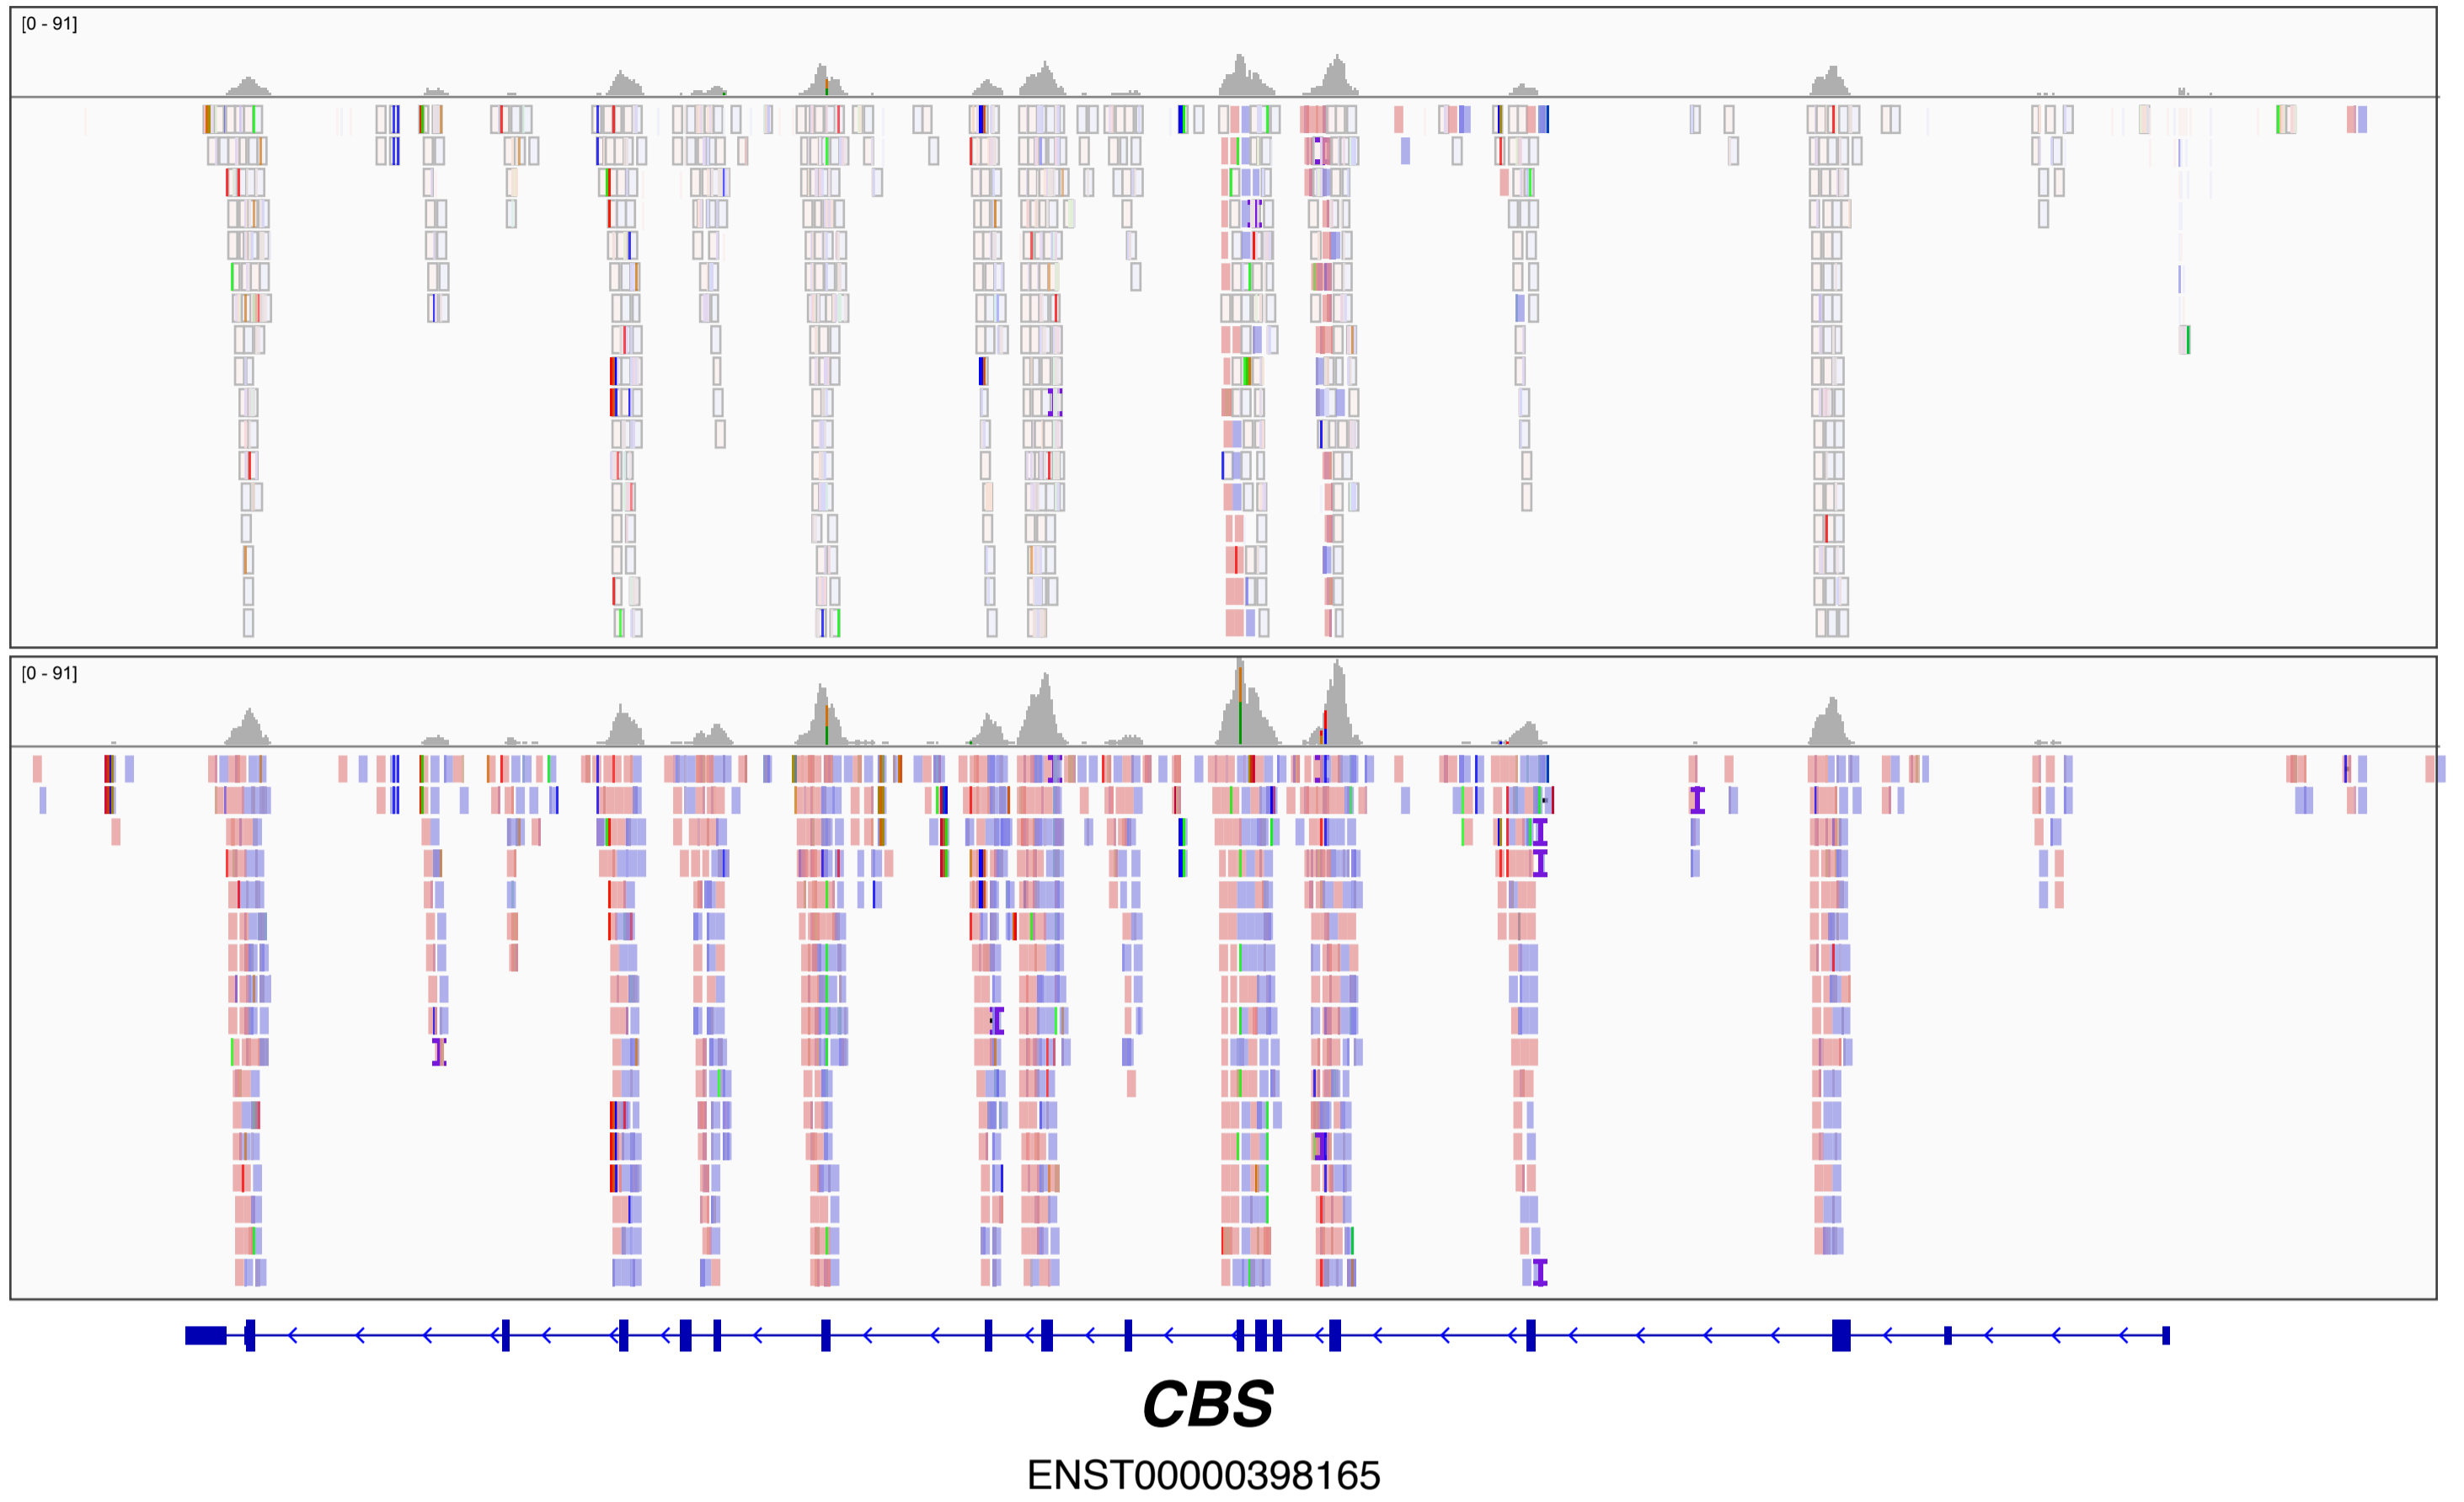**B**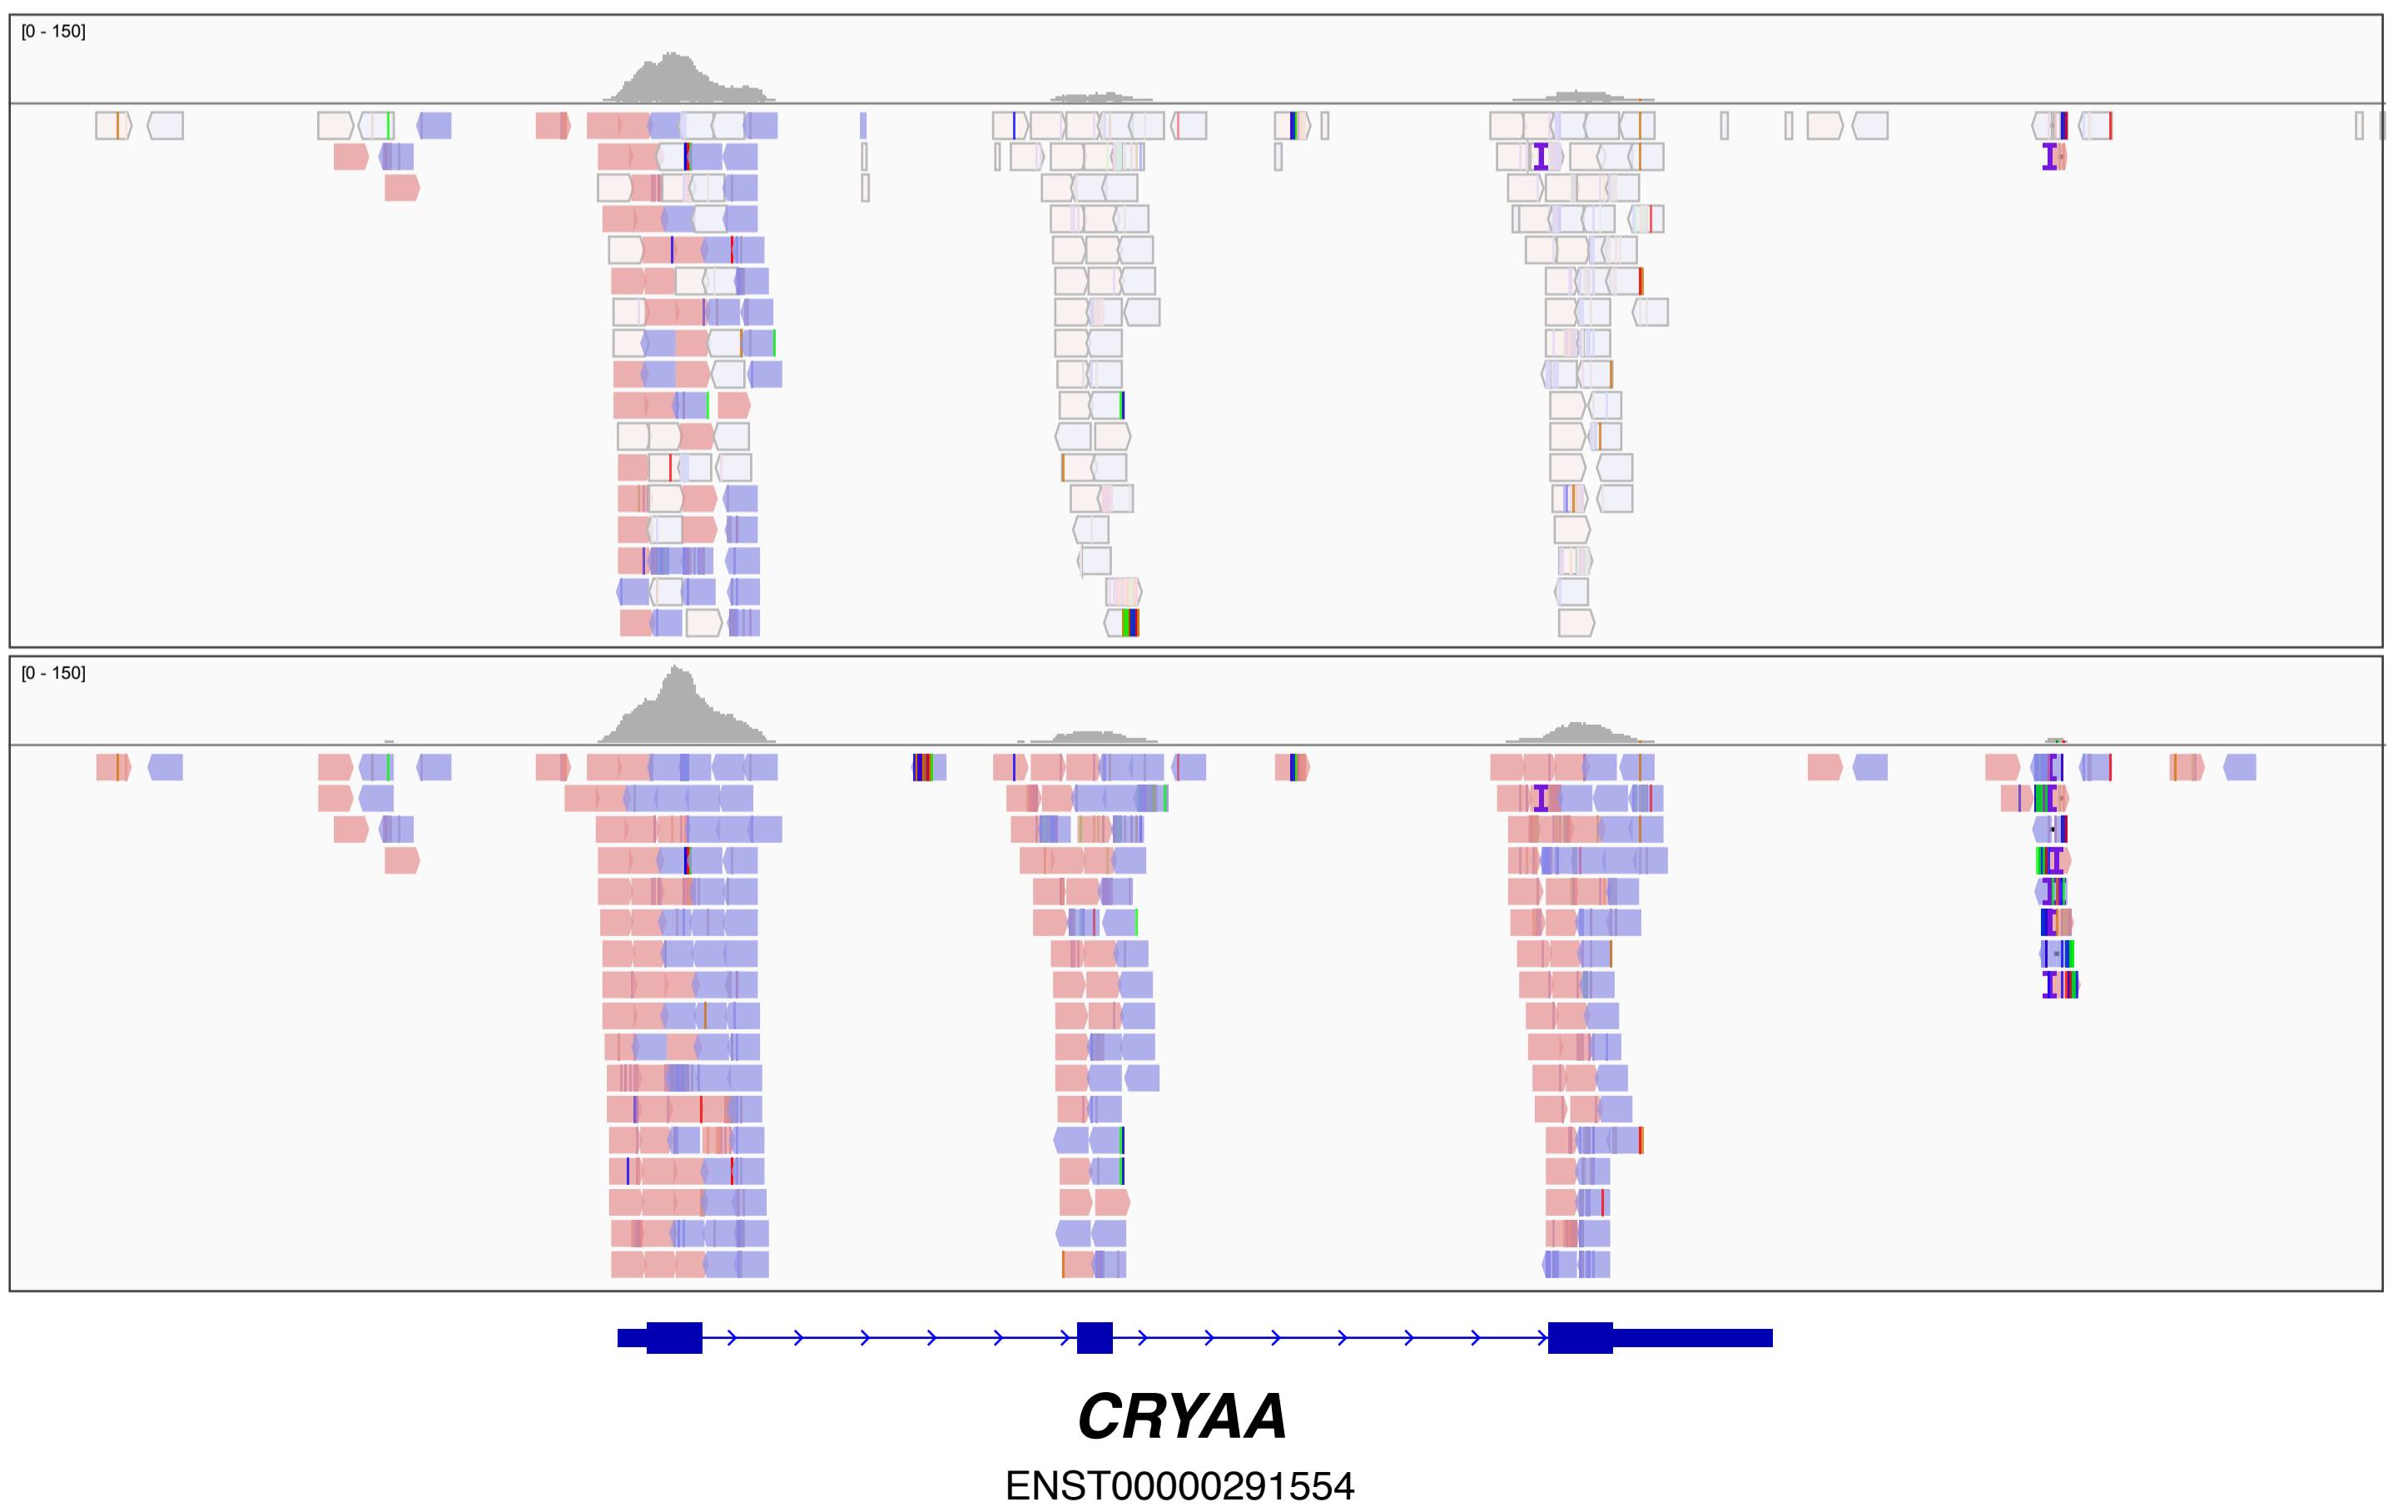

Supplement: mmc1.pdf [file mmc1.pdf]
