# Supplementary material for: Failure to Detect Mutations in U2AF1 due to Changes in the GRCh38 Reference Sequence
Source: PubMed Central journal article supplement (PMC8950341; doi:10.1016/j.jmoldx.2021.10.013), 2022-03
Supplement: mmc2.pdf [file mmc2.pdf]

[0 - 4383]

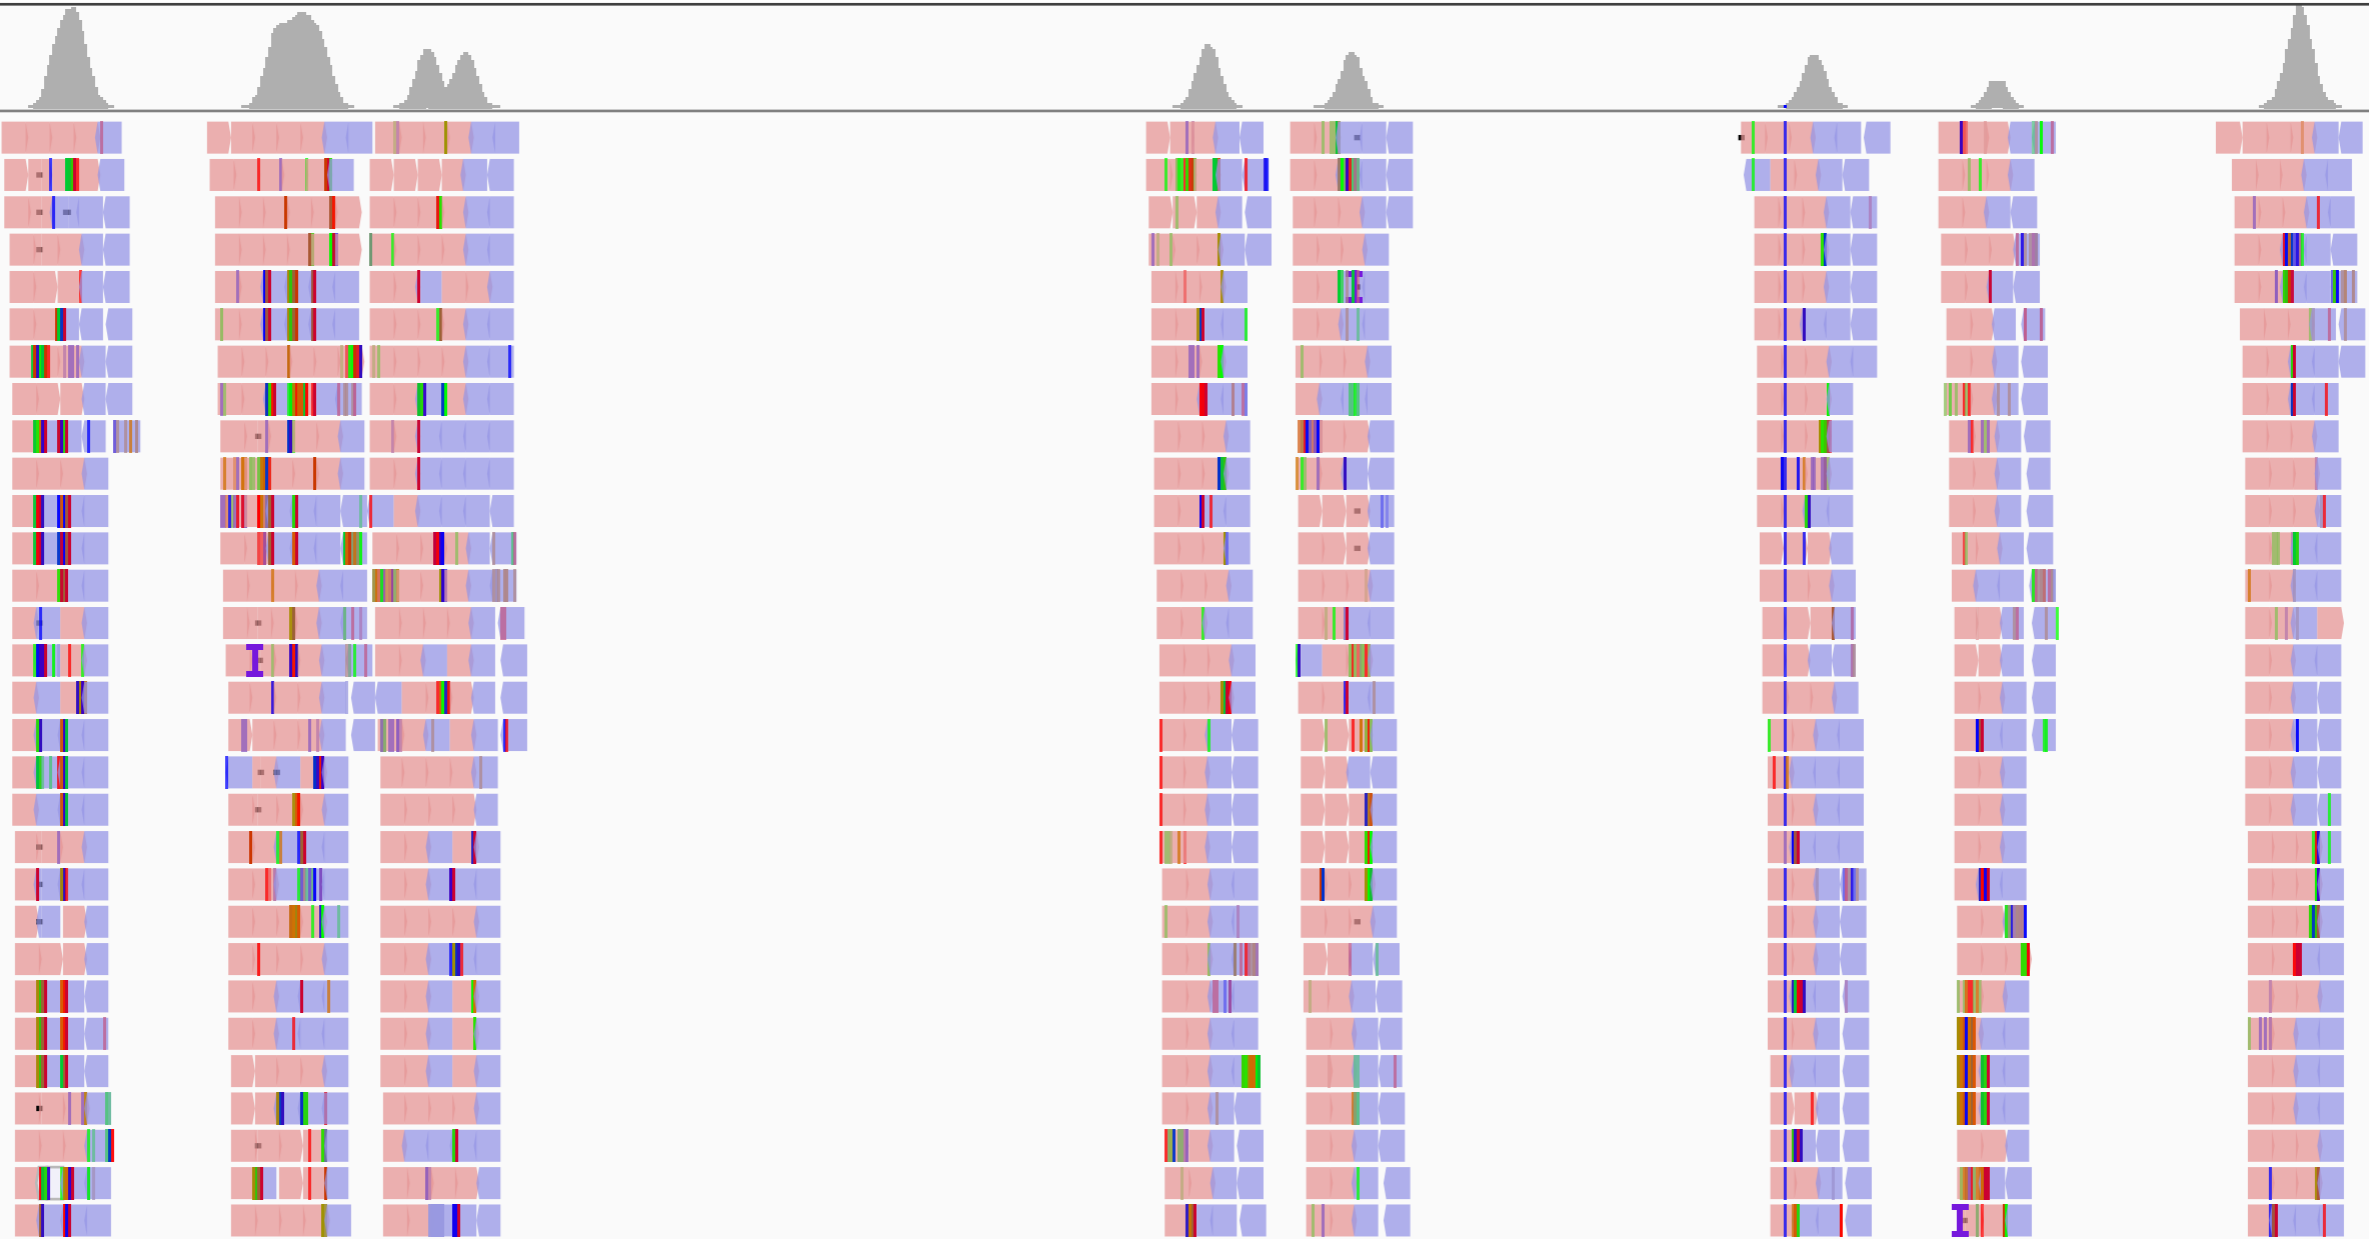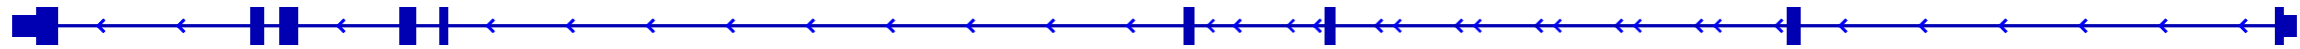

***U2AF1***

ENST00000291552
